# Supplementary material for: Gender linked fate explains lower legal abortion support among white married women
Source: PLOS journal article supplement (doi:10.1371/journal.pone.0223271), 2019-10-10
Supplement: S1 (10.1371/journal.pone.0223271.s001) [file journal.pone.0223271.s001]

**S1 Table. Sample Profile.** *N* = 4,460; Numbers might not sum up to 100% due to missing data; \*'Other' included: student, unemployed, homemaker, disabled, retired.

|                                                                     | <i>Female (n = 2,225)</i> |           | <i>Male (n = 2,235)</i> |           |
|---------------------------------------------------------------------|---------------------------|-----------|-------------------------|-----------|
|                                                                     | <i>N</i>                  | <i>%</i>  | <i>N</i>                | <i>%</i>  |
| Married                                                             | 1,248                     | 56.1      | 1,351                   | 60.4      |
| Single                                                              | 513                       | 23.1      | 534                     | 15.7      |
| Divorced/separated                                                  | 464                       | 20.9      | 350                     | 23.9      |
| White                                                               | 1,371                     | 61.6      | 1,497                   | 67.0      |
| Black                                                               | 470                       | 21.1      | 358                     | 16.0      |
| Latina/Latino                                                       | 384                       | 17.3      | 380                     | 17.0      |
| Employed                                                            | 1,100                     | 49.4      | 1,276                   | 57.1      |
| Other*                                                              | 1,123                     | 50.5      | 955                     | 42.7      |
| Have children (eighteen or younger) at home                         | 834                       | 37.5      | 643                     | 28.8      |
| No children                                                         | 1,390                     | 62.5      | 1,590                   | 71.1      |
|                                                                     | <i>M</i>                  | <i>SD</i> | <i>M</i>                | <i>SD</i> |
| Age                                                                 | 48.10                     | 15.68     | 49.88                   | 16.21     |
| Income (1-under \$5,000, 28-\$250,000 or more)                      | 13.58                     | 8.03      | 14.96                   | 8.12      |
| Education (1-less than high school credential, 5-graduate degree)   | 2.98                      | 1.15      | 3.06                    | 1.16      |
| Religiosity (frequency of church attendance; 1-every week, 5-never) | 3.20                      | 1.63      | 3.48                    | 1.62      |
| Ideology (1-liberal, 7-conservative)                                | 4.09                      | 1.49      | 4.26                    | 1.46      |
| Abortion support (1-oppose a great deal, 9-favor a great deal)      | 4.98                      | 3.41      | 4.79                    | 3.27      |
