# Supplementary material for: Gender linked fate explains lower legal abortion support among white married women
Source: PLOS journal article supplement (doi:10.1371/journal.pone.0223271), 2019-10-10
Supplement: S2 (10.1371/journal.pone.0223271.s002) [file journal.pone.0223271.s002]

**S2 Table. Sample Profile of Women Included in the Analysis of Gender Linked Fate.** *N* = 2,173; Numbers might not sum up to 100% due to missing data; \*'Other' included: student, unemployed, homemaker, disabled, retired; Analysis with 'homemaker' as a separate category did not alter the results.

|                                                                     | <i>White (n = 1,339)</i> |           | <i>Black (n = 461)</i> |           | <i>Latina (n = 373)</i> |           |
|---------------------------------------------------------------------|--------------------------|-----------|------------------------|-----------|-------------------------|-----------|
|                                                                     | <i>N</i>                 | <i>%</i>  | <i>N</i>               | <i>%</i>  | <i>N</i>                | <i>%</i>  |
| Married                                                             | 881                      | 65.8      | 132                    | 28.6      | 201                     | 53.9      |
| Single                                                              | 221                      | 16.5      | 189                    | 41.0      | 94                      | 25.2      |
| Divorced/separated                                                  | 237                      | 17.7      | 140                    | 30.4      | 78                      | 20.9      |
| Employed                                                            | 664                      | 49.4      | 231                    | 50.1      | 182                     | 48.8      |
| Other*                                                              | 674                      | 50.3      | 230                    | 49.9      | 190                     | 50.9      |
| Have children (eighteen or younger) at home                         | 406                      | 69.6      | 252                    | 54.7      | 179                     | 48.0      |
| No children                                                         | 932                      | 30.3      | 209                    | 45.3      | 194                     | 52.0      |
| Gender linked fate (none)                                           | 399                      | 29.8      | 153                    | 33.2      | 136                     | 36.5      |
| Gender linked fate (a little)                                       | 89                       | 6.6       | 22                     | 4.8       | 40                      | 10.7      |
| Gender linked fate (some)                                           | 532                      | 39.7      | 165                    | 35.8      | 107                     | 28.7      |
| Gender linked fate (a lot)                                          | 319                      | 23.8      | 121                    | 26.2      | 90                      | 24.1      |
|                                                                     | <i>M</i>                 | <i>SD</i> | <i>M</i>               | <i>SD</i> | <i>M</i>                | <i>SD</i> |
| Age                                                                 | 50.47                    | 15.48     | 45.59                  | 14.71     | 48.88                   | 15.62     |
| Education (1-less than high school credential, 5-graduate degree)   | 3.16                     | 1.12      | 2.77                   | 1.10      | 2.61                    | 1.13      |
| Income (1-under \$5,000, 28-\$250,000 or more)                      | 15.35                    | 7.90      | 10.03                  | 7.32      | 11.06                   | 7.28      |
| Religiosity (frequency of church attendance; 1-every week, 5-never) | 3.35                     | 1.65      | 2.81                   | 1.52      | 3.14                    | 1.59      |
| Ideology (1-liberal, 7-conservative)                                | 4.26                     | 1.51      | 3.63                   | 1.34      | 3.95                    | 1.42      |
| Abortion support (1-oppose a great deal, 9-favor a great deal)      | 4.84                     | 3.47      | 5.58                   | 3.22      | 4.72                    | 3.32      |
