# Supplementary material for: Gender linked fate explains lower legal abortion support among white married women
Source: PLOS journal article supplement (doi:10.1371/journal.pone.0223271), 2019-10-10
Supplement: S8 (10.1371/journal.pone.0223271.s008) [file journal.pone.0223271.s008]

**S8 Table. Alternative Mediation Models Explaining the Marital Status – Abortion Support Link.** \* $p < 0.05$ , \*\* $p < 0.01$ ; 95%CI – bootstrap percentile confidence intervals based on 1,000 bootstrap samples; *Note.* Effects were adjusted for age, income, employment status, education, having children (eighteen or younger) at home, religiosity (frequency of church attendance), and political ideology.

| Indirect effects                     | <i>White</i>       | <i>Black</i>        | <i>Latina</i>       |
|--------------------------------------|--------------------|---------------------|---------------------|
|                                      | b [95% CI]         | b [95% CI]          | b [95% CI]          |
| <b>Single vs married</b>             |                    |                     |                     |
| Gender linked fate                   | 0.09* [0.02, 0.18] | -0.01 [-0.15, 0.17] | 0.04 [-0.21, 0.29]  |
| Discrimination                       | 0.03 [-0.06, 0.12] | -0.06 [-0.21, 0.06] | -0.12 [-0.33, 0.06] |
| Traditional gender roles             | 0.03 [-0.03, 0.10] | -0.08 [-0.31, 0.10] | 0.13 [-0.05, 0.35]  |
| Feminist feeling thermometer         | 0.06 [-0.03, 0.14] | -0.11 [-0.29, 0.02] | -0.01 [-0.01, 0.11] |
| <b>Divorced/separated vs married</b> |                    |                     |                     |
| Gender linked fate                   | 0.08* [0.02, 0.15] | 0.03 [-0.12, 0.17]  | 0.07 [-0.08, 0.27]  |
| Discrimination                       | 0.03 [-0.03, 0.11] | -0.06 [-0.20, 0.03] | -0.07 [-0.24, 0.06] |
| Traditional gender roles             | 0.02 [-0.03, 0.07] | 0.07 [-0.05, 0.20]  | -0.01 [-0.12, 0.15] |
| Feminist feeling thermometer         | 0.06 [-0.01, 0.13] | -0.01 [-0.13, 0.11] | 0.02 [-0.12, 0.15]  |
